# Supplementary material for: Revisiting the Role of VraTSR in Staphylococcus aureus Response to Cell Wall-Targeting Antibiotics
Source: PubMed Central journal article supplement (PMC9380581; doi:10.1128/jb.00162-22), 2022-07-13
Supplement: jb.00162-22-s0001.pdf [file jb.00162-22-s0001.pdf]

# Revisiting the role of VraTSR in *Staphylococcus aureus* response to cell wall targeting antibiotics

## Supplemental Information

Pedro B. Fernandes, Patricia Reed, João M. Monteiro and Mariana G. Pinho

### Supplemental Methods

#### Construction of *S. aureus* strains

Sequence of primers used for strain construction as listed in Supplemental Table 3.

To construct the *vraTSR* promoter fusion, an 814-bp DNA fragment containing the *vraTSR* promoter region was amplified from COL genomic DNA using primers PvraSR\_P1\_KpnI and PvraSR\_P2\_New\_XhoI, digested with KpnI and XhoI, and cloned into KpnI/XhoI digested pFAST3, upstream of *sfgfp-p7*, resulting in plasmid pPvra-pFAST3, confirmed by DNA sequencing. pPvra-pFAST3 was electroporated into the *S. aureus* RN4220 strain and integrated into the chromosome at the *vraTSR* promoter site by homologous recombination, as confirmed by PCR and sequencing; the resulting strain was named RN Pvra-sGFP. Strain COL Pvra-sGFP was constructed by transducing the integrated plasmid pPvra-pFAST3 from RN Pvra-sGFP into COL using phage80 $\alpha$ , as previously described<sup>1</sup>.

To construct the *S. aureus*  $\Delta$ *pbpB* null mutant, lacking PBP2, we amplified 1Kb DNA fragments from *S. aureus* COL genomic DNA corresponding to the upstream (primers PBP2\_KO-P1 and PBP2\_KO-P2) and downstream (primers PBP2\_KO-P13 and PBP2\_KO-P4) regions of the *pbpB* gene. The resulting PCR products were joined by overlap PCR using primers PBP2\_KO-P1 and PBP2\_KO-P4. The overlap PCR product was digested with EcoRI and BamHI and cloned into the thermosensitive plasmid pMAD<sup>2</sup>, producing plasmid p $\Delta$ *pbpB*. The plasmid was sequenced and introduced into RN4220 by electroporation<sup>3</sup>. Following electroporation, the plasmid was transduced into COL using phage 80 $\alpha$ .

as previously described<sup>1</sup>. Insertion and excision of  $p\Delta pbpB$  was performed as previously described<sup>2</sup>, except the integration steps were performed at 37 °C instead of 43 °C, resulting in strain  $COL\Delta pbpB$ . Deletion of the target gene was verified by PCR and resulting strains were verified by whole genome sequencing.

To monitor *vraTSR* expression levels in the mutants lacking different enzymes involved in the last stages of peptidoglycan synthesis, pPvra-pFAST3 was transduced into the corresponding mutant strains, using phage 80 $\alpha$ , with erythromycin selection, resulting in strains: ColPBP1TP\_Pvra-sGFP,  $COL\Delta pbpB$ \_Pvra-sGFP,  $COL\Delta pbp3$ \_Pvra-sGFP,  $COL\Delta pbpD$ \_Pvra-sGFP,  $COL\Delta mgt$ \_Pvra-sGFP,  $COL\Delta sgtA$ \_Pvra-sGFP and  $COL\Delta mecA$ \_Pvra-sGFP.

To investigate the mechanism behind PBP2-dependent VraTSR activation,  $COL\Delta pbpB$ \_Pvra-sGFP was complemented with plasmids encoding different alleles of PBP2. For that, a 2214-bp fragment encompassing the wild type *pbpB* allele was amplified using primers PBP2mut<sub>s</sub>\_P1 and PBP2mut<sub>s</sub>\_P2 from *S. aureus* COL genomic DNA. The same pair of primers was used to amplify a fragment, coding for the transglycosylase-inactive PBP2<sup>E114Q</sup> from COLTG42<sup>4</sup> genomic DNA. These fragments were introduced into SmaI-digested pCNX using a Gibson assembly cloning kit (NEB), originating plasmids pPBP2 and pPBP2TG. Transduction of these plasmid into  $COL\Delta pbpB$ \_Pvra-sGFP gave  $COL\Delta pbpB$ \_Pvra-sGFPpPBP2 and  $COL\Delta pbpB$ \_Pvra-sGFPpPBP2TG\*, respectively. To construct plasmid pCNX-pbp2TP, a full copy of *pbpB* allele encoding for PBP2<sup>S398G</sup> (pbp2TP) was cloned into the pCNX plasmid, downstream of the cadmium inducible  $P_{cad}$  promoter. The pbp2TP sequence was amplified from pMAD-pbp2TPbig which was constructed by amplifying two PCR fragments encompassing 1.7 kb upstream or downstream of nucleotide T1192 of *pbpB* using primers P1pMADpbp2TP/ P2pMADpbp2TP and P3pMADpbp2TP/ P4pMADpbp2TP, respectively. The two fragments were joined by overlap PCR using primers pair P1pMADpbp2TP and P4pMADpbp2TP, digested with BglII and SmaI and cloned into pMAD, creating plasmid pMADpbp2TPbig. This plasmid contains the nucleotide exchanges T1192G and C1193G which switch the catalytic serine from the TP domain of PBP2 to a glycine (S398G) and a silent mutation (T1197C) that introduces a BamHI restriction site to facilitate screening

of clones. The pMAD-PBP2TPbig plasmid served as a template to amplify the full *pbp2TP* allele using primers P1pCNXpbp2 and P2pCNXpbp2. The resulting PCR fragment was cloned downstream of the  $P_{cad}$  promoter of pCNX plasmid, after digesting with Sall and KpnI, resulting in plasmid pCNX-pbp2TP. pCNX-pbp2TP was then transduced to COL $\Delta$ *pbpB*\_Pvra-sGFP, originating strain COL $\Delta$ *pbpB*\_Pvra-sGFPpPBP2TP\*. To construct pPBP2TGTP, the mutation coding for transglycosylase-inactive PBP2<sup>E114Q</sup> was inserted into plasmid pCNX-pbp2TP, via site-directed mutagenesis, using primers E114Q fw and E114Q rev. The resulting plasmid was transduced to COL $\Delta$ *pbpB*\_Pvra-sGFP, giving strain COL $\Delta$ *pbpB*\_Pvra-sGFPpPBP2TG\*TP\*.

To localize VraT and VraS, an N-terminal fusion of VraT to the P7 variant of superfast GFP (sfGFP)<sup>5</sup> and a C-terminal fusion of VraS to mCherry were constructed. A 409-bp fragment encoding the upstream region of *vraT* was amplified by PCR from *S. aureus* COL genomic DNA, using primers orf1\_fw\_EcoRI and orf1\_rev\_link\_sgfp. Primers sgfp\_fw\_link\_orf1 and sgfp\_rev\_link\_vraT were used to amplify *gfp* from pFAST3. A third 744-bp fragment containing *vraT* and a sequence encoding an 11 amino acid linker was amplified using primers vraT fw\_link\_sgfp and vraT rev BamHI. The fragments were joined by overlap PCR using the primers orf1\_fw\_EcoRI and vraT rev BamHI. The resulting fragment was digested with EcoRI and BamHI restriction enzymes and cloned into pMAD, giving pVraT-GFP. The plasmid was sequenced and then electroporated into *S. aureus* RN4220 strain at 30 °C, using erythromycin and X-gal selection, and transduced to COL using phage 80 $\alpha$ . Integration and excision of the plasmid into the chromosome was performed as previously described<sup>2</sup>, giving COLsGFP\_VraT. An 862-bp fragment encoding VraS, excluding the stop codon, and a sequence encoding an 11 amino acid linker was amplified by PCR from *S. aureus* COL genomic DNA, using primers VraSCterfwdNcoI and VraSmchMLbwd. Primers mCherryMLfwd and mCherrybwd2 were used to amplify *mCherry* from pBCB4-Cherry. A third 860-bp fragment containing the downstream region of *vraS* was amplified using primers Vrasfwd3 and VraRbwdBamHI. The fragments were joined by overlap PCR using the primers mCherryMLfwd and VraRbwdBamHI. The resulting fragment was digested with NcoI and BamHI restriction enzymes and cloned into pMAD, giving

pVraS-mCherry. The plasmid was sequenced and then electroporated into *S. aureus* RN4220 strain at 30 °C, using erythromycin selection in the presence of X-gal, and transduced into COLsGFP\_VraT, using phage 80 $\alpha$ . Integration and excision of the plasmid into the chromosome was performed as described<sup>2</sup>, resulting in strain COLsGFP-VraTVraS-mCherry.

To determine the topology of VraT, PhoB fusions to VraT were made at both N- and C-terminal ends. For the N-terminal fusion to VraT a 1389-bp fragment encompassing *phoB* allele and a 5 amino acid linker was amplified using primers phoB\_vraT\_P1 and phoB\_vraT\_P2 from *S. aureus* COL genomic DNA. Another fragment with 748-bp with *vraT* coding sequence was amplified from the same genomic DNA, using primers phoB\_vraT\_P3 and phoB\_vraT\_P4. These fragments were introduced into SmaI-digested pCN51 using a Gibson assembly cloning kit (NEB), originating plasmid pPhoB\_VraT. For the C-terminal PhoB fusion to VraT, a 772-bp fragment with *vraT* coding sequence and encoding a 5 amino acid linker was amplified from *S. aureus* COL genomic DNA, using primers vraT\_phoB\_P1 and vraT\_phoB\_P2. Primers vraT\_phoB\_P3 and vraT\_phoB\_P4 were used to amplify a 1376-bp DNA fragment with *phoB* coding sequence, from the same genomic template. These fragments were introduced into SmaI-digested pCN51 using a Gibson assembly cloning kit (NEB), originating plasmid pVraT-PhoB. Plasmids pCN51, pPhoB\_VraT and pVraT-PhoB were transduced to COL $\Delta$ *phoB*, giving strains COL $\Delta$ *phoB*pCN51, COL $\Delta$ *phoB*pPhoB-VraT and COL $\Delta$ *phoB*pVraT-PhoB, respectively.

## Supplemental Figures

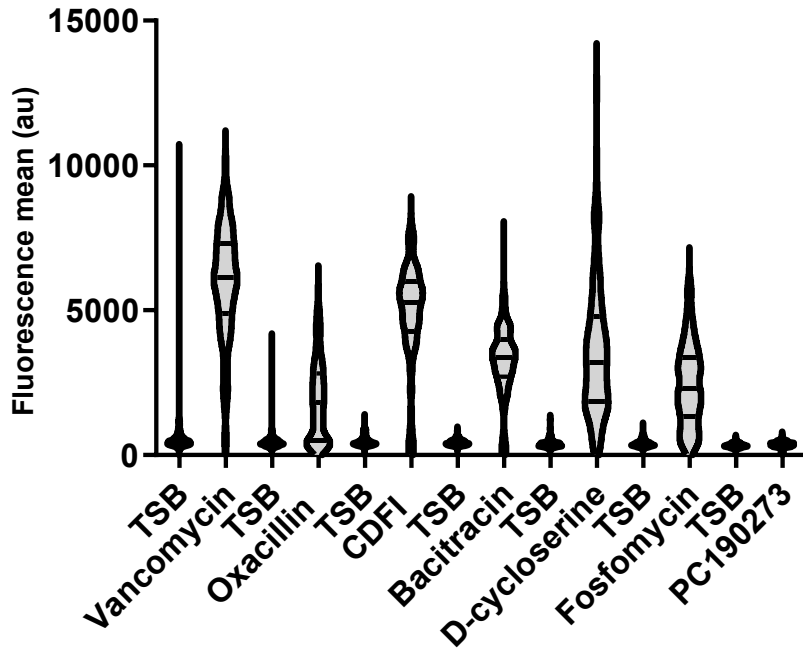

**Supplementary Figure 1. Blocking early, middle or late stages of CW synthesis results in *Vra*TSR activation.** *S. aureus* cells expressing GFP under the control of the *vra*TSR promoter (COL Pvra-sGFP) were incubated with 1x MIC of different CW targeting antibiotics for 60 mins prior to imaging by fluorescence microscopy. Cells from a control experiment, with no antibiotic, were always present on the same slide and those cells were labelled with DNA dye Hoechst 33342, to discriminate the two populations. Incubation with the FtsZ inhibitor PC190273, an antibiotic that does not target the CW synthesis, was also included as a control. N > 223 cells for each condition. Data represented in violin plots where the middle line represents the median and the other two lines the quartiles.

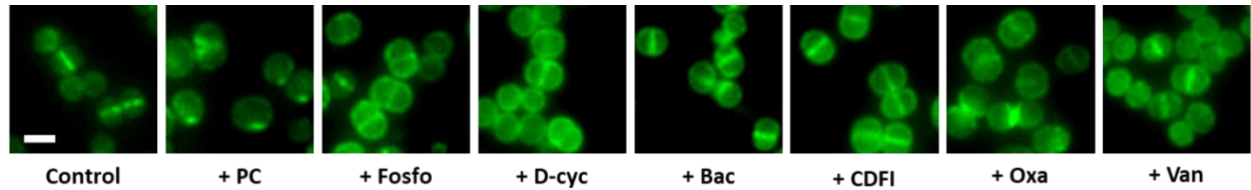

**Supplementary Figure 2. PBP2 delocalizes in the presence of cell wall targeting antibiotics.** COL *pbpB::sgfp-pbpB* (BCBPM073) cells were imaged by epifluorescence microscopy after incubation for 60 min with 1 x MIC of PC190273, (+PC, 1  $\mu\text{g mL}^{-1}$ ), fosfomycin (+Fosfo, 300  $\mu\text{g mL}^{-1}$ ), D-cycloserine (+D-cyc, 125  $\mu\text{g mL}^{-1}$ ), bacitracin (+Bac, 40  $\mu\text{g mL}^{-1}$ ), 2-(2-Chlorophenyl)-3-[1-(2,3-dimethylbenzyl)piperidin-4-yl]-5-fluoro-1H-indole (+CDFI, 1.5  $\mu\text{g mL}^{-1}$ ), oxacillin (+Oxa, 800  $\mu\text{g mL}^{-1}$ ) and vancomycin (+Van, 2  $\mu\text{g mL}^{-1}$ ). Incubation in TSB without antibiotics was used as negative control. In the presence of all antibiotics tested, septal enrichment of PBP2 is lost or decreased and the protein becomes dispersed over the membrane. Scale bar = 1  $\mu\text{m}$

## Supplemental Tables

**Supplementary Table 1. Plasmids used in this study**

| Plasmids      | Description                                                                                                                                                    | Source or reference |
|---------------|----------------------------------------------------------------------------------------------------------------------------------------------------------------|---------------------|
| pCN51         | Shuttle vector containing a cadmium inducible Pcad promoter; Amp <sup>R</sup> Ery <sup>R</sup>                                                                 | 6                   |
| pCNX          | Shuttle vector containing a cadmium inducible Pcad promoter; Amp <sup>R</sup> Kan <sup>R</sup>                                                                 | 7                   |
| pMAD          | <i>E. coli-S. aureus</i> shuttle vector with a thermosensitive origin of replication for Gram-positive bacteria; Amp <sup>R</sup> Ery <sup>R</sup> <i>lacZ</i> | 2                   |
| pBCB4-ChE     | <i>S. aureus</i> integrative vector for N- and C-terminal mCherry fusions; Amp <sup>R</sup> Ery <sup>R</sup>                                                   | 8                   |
| pFAST3        | <i>S. aureus</i> integrative vector that allows for C-terminal sGFP fusions; Amp <sup>R</sup> Ery <sup>R</sup>                                                 | 9                   |
| pPvra-pFAST3  | <i>S. aureus</i> integrative vector with <i>vraTSR</i> promoter upstream of <i>sfgfp-p7</i>                                                                    | This study          |
| pPBP2         | pCNX derivative containing <i>pbpB</i> under the control of Pcad promoter; Amp <sup>R</sup> Kan <sup>R</sup>                                                   | This study          |
| pPBP2TG       | pCNX derivative containing <i>pbpBTG</i> (E114Q) under the control of Pcad promoter; Amp <sup>R</sup> Kan <sup>R</sup>                                         | This study          |
| pCNX-pbp2TP   | pCNX derivative containing <i>pbp2TP</i> (S398G) under the control of Pcad promoter; Amp <sup>R</sup> Kan <sup>R</sup>                                         | This study          |
| pPBP2TGTP     | pCNX derivative containing <i>pbp2TGTP</i> (E114Q and S398G) under the control of Pcad promoter; Amp <sup>R</sup> Kan <sup>R</sup>                             | This study          |
| pVraT-GFP     | pMAD with <i>sgfp</i> 5' fusion to <i>vraT</i> , Amp <sup>R</sup> , Ery <sup>R</sup>                                                                           | This study          |
| pVraS-mCherry | pMAD with <i>mCherry</i> 3' fusion to <i>vraS</i> , Amp <sup>R</sup> , Ery <sup>R</sup>                                                                        | This study          |
| pVraT-PhoB    | pCN51 derivative containing <i>phoB</i> 3' fusion to <i>vraT</i> under the control of Pcad promoter, Amp <sup>R</sup> , Ery <sup>R</sup>                       | This study          |
| pPhoB_VraT    | pCN51 derivative containing <i>phoB</i> 5' fusion to <i>vraT</i> under the control of Pcad promoter, Amp <sup>R</sup> , Ery <sup>R</sup>                       | This study          |

**Supplementary Table 2. Strains used in this study.**

| Strains                                        | Description                                                                                        | Source or reference |
|------------------------------------------------|----------------------------------------------------------------------------------------------------|---------------------|
| <i>Escherichia coli</i>                        |                                                                                                    |                     |
| DC10B                                          | $\Delta dcm$ in the DH10B background; Dam methylation only                                         | 10                  |
| <i>Staphylococcus aureus</i>                   |                                                                                                    |                     |
| COL                                            | HA-MRSA                                                                                            | 11                  |
| RN4220                                         | Restriction-deficient derivative of NCTC8325-4                                                     | 12                  |
| COL Pvra-sGFP                                  | COL with pFAST3-Pvra; Ery <sup>R</sup>                                                             | This study          |
| ColPBP1TP                                      | COL tet <sup>S</sup> <i>pbpA::pbpA</i> <sup>S314A</sup>                                            | 13                  |
| COL $\Delta$ <i>pbpB</i>                       | <i>pbpB</i> deletion in COL                                                                        | This study          |
| COL $\Delta$ <i>pbp3</i>                       | <i>pbp3</i> deletion in COL                                                                        | 13                  |
| COL $\Delta$ <i>pbpD</i>                       | <i>pbpD</i> deletion in COL                                                                        | 14                  |
| COL $\Delta$ <i>mgt</i>                        | <i>mgt</i> deletion in COL                                                                         | 15                  |
| COL $\Delta$ <i>sgtA</i>                       | <i>sgtA</i> deletion in COL                                                                        | 15                  |
| COL $\Delta$ <i>mecA</i>                       | <i>mecA</i> deletion in COL                                                                        | 16                  |
| ColPBP1TP_Pvra-sGFP                            | COL tet <sup>S</sup> <i>pbpA::pbpA</i> <sup>S314A</sup> with pPvra-pFAST3; Ery <sup>R</sup>        | This study          |
| COL $\Delta$ <i>pbpB</i> _Pvra-sGFP            | COL $\Delta$ <i>pbpB</i> with pPvra-pFAST3; Ery <sup>R</sup>                                       | This study          |
| COL $\Delta$ <i>pbp3</i> _Pvra-sGFP            | COL $\Delta$ <i>pbp3</i> with pPvra-pFAST3; Ery <sup>R</sup>                                       | This study          |
| COL $\Delta$ <i>pbpD</i> _Pvra-sGFP            | COL $\Delta$ <i>pbpD</i> with pPvra-pFAST3; Ery <sup>R</sup>                                       | This study          |
| COL $\Delta$ <i>mgt</i> _Pvra-sGFP             | COL $\Delta$ <i>mgt</i> with pPvra-pFAST3; Ery <sup>R</sup>                                        | This study          |
| COL $\Delta$ <i>sgtA</i> _Pvra-sGFP            | COL $\Delta$ <i>sgtA</i> with pPvra-pFAST3; Ery <sup>R</sup>                                       | This study          |
| COL $\Delta$ <i>mecA</i> _Pvra-sGFP            | COL $\Delta$ <i>mecA</i> with pPvra-pFAST3; Ery <sup>R</sup>                                       | This study          |
| COL $\Delta$ <i>pbpB</i> _Pvra-sGFPpCNX        | COL $\Delta$ <i>pbpB</i> _Pvra-sGFP with pCNX; Ery <sup>R</sup> , Kan <sup>R</sup>                 | This study          |
| COL $\Delta$ <i>pbpB</i> _Pvra-sGFPpPBP2       | COL $\Delta$ <i>pbpB</i> _Pvra-sGFP with pPBP2; Ery <sup>R</sup> , Kan <sup>R</sup>                | This study          |
| COL $\Delta$ <i>pbpB</i> _Pvra-sGFPpPBP2TG*    | COL $\Delta$ <i>pbpB</i> _Pvra-sGFP with pPBP2TG; Ery <sup>R</sup> , Kan <sup>R</sup>              | This study          |
| COL $\Delta$ <i>pbpB</i> _Pvra-sGFPpPBP2TP*    | COL $\Delta$ <i>pbpB</i> _Pvra-sGFP with pCNX- <i>pbp2TP</i> ; Ery <sup>R</sup> , Kan <sup>R</sup> | This study          |
| COL $\Delta$ <i>pbpB</i> _Pvra-sGFPpPBP2TG*TP* | COL $\Delta$ <i>pbpB</i> _Pvra-sGFP and pPBP2TGTP, Ery <sup>R</sup> , Kan <sup>R</sup>             | This study          |
| BCBPM073                                       | COL <i>pbpB::sgfp-pbpB</i>                                                                         | 17                  |
| COLsGFP_VraT                                   | COL <i>vraT::sgfp-vraT</i>                                                                         | This study          |
| COLsGFP-VraTVraS-mCherry                       | COL <i>vraT::sgfp-vraT</i> , <i>vraS::vraS-mcherry</i>                                             | This study          |
| COL $\Delta$ <i>phoB</i>                       | <i>phoB</i> deletion in COL                                                                        | Veiga & Pinho       |



|                                     |                                                            |            |
|-------------------------------------|------------------------------------------------------------|------------|
| COL $\Delta$ <i>phoB</i> pCN51      | Col $\Delta$ <i>phoB</i> with pCN51; Ery <sup>R</sup>      | This study |
| COL $\Delta$ <i>phoB</i> pVraT-PhoB | Col $\Delta$ <i>phoB</i> with pVraT_PhoB; Ery <sup>R</sup> | This study |
| COL $\Delta$ <i>phoB</i> pPhoB-VraT | Col $\Delta$ <i>phoB</i> with pPhoB_VraT; Ery <sup>R</sup> | This study |

---

**Supplementary Table 3. Oligonucleotides used in this study**

| <b>Primer name</b> | <b>Sequence (5'-3')</b>                                                   |
|--------------------|---------------------------------------------------------------------------|
| PVraSR_P1_KpnI     | gctgcggtaccggtgctatttctgcgc                                               |
| PVraSR_P2_New_Xho  | cgcgctcgagttataataagtttaaaataccaaatgcgc                                   |
| PBP2KO-P1          | acgacgaattctcaaatacacttctgctg                                             |
| PBP2KO-P2          | tagttgaatataatccgcatcacggtcctcacttc                                       |
| PBP2KO-P3          | tgaggaccgctatgacggatattcaactaatc                                          |
| PBP2KO-P4          | acgcaggattctgccaactattagaagattg                                           |
| PBP2mutS_P1        | ggtcgactctagaggatccccgtgatattagatga<br>aagtgaggaccgctatgacggaaaacaaaggatc |
| PBP2mutS_P2        | gcctgaattcgagctcggtacccttagttgaatatacctgtaatcc                            |
| P1pMADpbp2TP       | gcgcccgggcattcaaatacgtttatc                                               |
| P2pMADpbp2TP       | cgcgatccaccagtagggtaggagtc                                                |
| P3pMADpbp2TP       | cgcgatccttaaacccttcttagcg                                                 |
| P4pMADpbp2TP       | cgcgctcgacgaatttaaaagaaagatag                                             |
| P1pCNXpbp2         | caggctgacaaaaataaggaggaaaaaaatgacggaaaaacaaaggatcttctc                    |
| P2pCNXpbp2         | cgcatggtaccttagttgaatatacctgtaatccaccgctgttc                              |
| E114Q fw           | gtactcgcgactcaagacaatcgttctacgaacatg                                      |
| E114Q rev          | cgattgtctgagtcgagtagtactgcgctcttc                                         |
| VraSCTerfwdNcoI    | cgcgccatggggtactcgttacaataatcaatcagc                                      |
| VraSmchMLbwd       | agaaccagcagcggagccagccgaattaaagggtgcttcacc                                |
| mCherryMLfwd       | tccgctgctggttctggcgagttcatgattgtgagcaagg                                  |
| mCherrybwd2        | atacgaatcctcctctagtagcagctcgtccatgccaccgg                                 |
| Vrasfwd3           | aaggaggattcgtatgacgattaagattgtttgtggatg                                   |
| VraRbwdBamHI       | gcgcgggatcctatcatggtgatgaacatcctagtgatacc                                 |
| orf1_fw_EcoRI      | gcgcaattcaaggatgattatgaactatggtgaacg                                      |
| orf1_rev_link_sgfp | ctatgccacagcgttcatataatatttagatagc                                        |
| sgfp_fw_link_orf1  | gaacgctgtggcataggatatacagaaggaggattcg                                     |
| sgfp_rev_link_vraT | gaactcgccagaaccagcagcggagccagccgaatgatggtgatggtcgcatttg                   |
| vraT fw_link_sgfp  | tcggctggctccgctgctggttctggcgagttcatgacacacaaatataatc                      |
| vraT rev bamHI     | gcgcgatcctcatcgataaatcacctctacgtctccgataaacg                              |
| phoB_vraT_P1       | gtcgactctagaggatccccctcaggaggatgtctatgcaatccgataaaagtctaaagatg            |
| phoB_vraT_P2       | catggaggcggcagcaggactgaaatatacaatattattttgctc                             |
| phoB_vraT_P3       | caagtctcggcgctcctcatgacacacaaatataatcaacg                                 |
| phoB_vraT_P4       | cctgaattcgagctcgtaccctcaactcatgataaatcacctctacgtc                         |
| vraT_phoB_P1       | ggtcgactctagaggatccccgaacgctgtggcatagaaaggcggcgaaac                       |
| vraT_phoB_P2       | cggattgggaggcggcaggatcgataaatcacctctacgtctcc                              |
| vraT_phoB_P3       | cgatcctcggcgctccaatccgataaaagtctaaag                                      |
| vraT_phoB_P4       | gcctgaattcgagctcggtacccttactgaaatatacaatattattttgctc                      |

## References

1. Oshida T, Tomasz A. Isolation and characterization of a Tn551-autolysis mutant of *Staphylococcus aureus*. *J Bacteriol.* 1992;174(15):4952-4959 doi:10.1128/JB.174.15.4952-4959.1992
2. Arnaud M, Chastanet A, Débarbouillé M. New vector for efficient allelic replacement in naturally nontransformable, low-GC-content, gram-positive bacteria. *Appl Environ Microbiol.* 2004;70(11):6887-6891 doi:10.1128/AEM.70.11.6887-6891.2004
3. Kraemer GR, Iandolo JJ. High-frequency transformation of *Staphylococcus aureus* by electroporation. *Curr Microbiol.* 1990;21(6):373-376 doi:10.1007/BF02199440
4. Pinho MG, de Lencastre H, Tomasz A. An acquired and a native penicillin-binding protein cooperate in building the cell wall of drug-resistant staphylococci. *Proc Natl Acad Sci U S A.* 2001; 98(19):10886-91 doi:10.1073/pnas.191260798
5. Fisher AC, DeLisa MP. Laboratory evolution of fast-folding green fluorescent protein using secretory pathway quality control. *PLoS One.* 2008;3(6):e2351 doi:10.1371/journal.pone.0002351
6. Charpentier E, Anton AI, Barry P, Alfonso B, Fang Y, Novick RP. Novel cassette-based shuttle vector system for gram-positive bacteria. *Appl Environ Microbiol.* 2004;70(10):6076-6085 doi:10.1128/AEM.70.10.6076-6085.2004
7. Monteiro JM, Fernandes PB, Vaz F, *et al.* Cell shape dynamics during the staphylococcal cell cycle. *Nat Commun.* 2015; 6, 8055 doi:10.1038/ncomms9055
8. Pereira PM, Veiga H, Jorge AM, Pinho MG. Fluorescent reporters for studies of cellular localization of proteins in *Staphylococcus aureus*. *Appl Environ Microbiol.* 2010;76(13):4346-4353 doi:10.1128/AEM.00359-10
9. Nair DR, Monteiro JM, Memmi G, *et al.* Characterization of a novel small molecule that potentiates  $\beta$ -lactam activity against gram-positive and gram-negative pathogens. *Antimicrob Agents Chemother.* 2015;59(4):1876-1885 doi:10.1128/AAC.04164-14
10. Monk IR, Shah IM, Xu M, Tan MW, Foster TJ. Transforming the untransformable: Application of direct transformation to manipulate genetically *Staphylococcus aureus* and *Staphylococcus epidermidis*. *MBio.* 2012;3(2) doi:10.1128/mBio.00277-11
11. Gill SR, Fouts DE, Archer GL, *et al.* Insights on evolution of virulence and resistance from the complete genome analysis of an early methicillin-resistant *Staphylococcus aureus* strain and a biofilm-producing methicillin-resistant *Staphylococcus epidermidis* strain. *J Bacteriol.* 2005;187(7):2426-2438 doi:10.1128/JB.187.7.2426-2438.2005
12. Nair D, Memmi G, Hernandez D, *et al.* Whole-genome sequencing of

*Staphylococcus aureus* strain RN4220, a key laboratory strain used in virulence research, identifies mutations that affect not only virulence factors but also the fitness of the strain. *J Bacteriol.* 2011;193(9):2332-2335. doi:10.1128/JB.00027-11

13. Reichmann NT, Tavares AC, Saraiva BM, *et al.* SEDS–bPBP pairs direct lateral and septal peptidoglycan synthesis in *Staphylococcus aureus*. *Nat Microbiol.* 2019;4(8):1368-1377 doi:10.1038/s41564-019-0437-2
14. Memmi G, Filipe SR, Pinho MG, Fu Z, Cheung A. *Staphylococcus aureus* PBP4 is essential for  $\beta$ -lactam resistance in community-acquired methicillin-resistant strains. *Antimicrob Agents Chemother.* 2008;52(11):3955-3966. doi:10.1128/AAC.00049-08
15. Reed P, Veiga H, Jorge AM, Terrak M, Pinho MG. Monofunctional transglycosylases are not essential for *Staphylococcus aureus* cell wall synthesis. *J Bacteriol.* 2011;193(10):2549-2556. doi:10.1128/JB.01474-10
16. Reed P, Atilano ML, Alves R, *et al.* *Staphylococcus aureus* survives with a minimal peptidoglycan synthesis machine but sacrifices virulence and antibiotic resistance. *PLoS Pathog.* 2015;11(5):e1004891 doi:10.1371/journal.ppat.1004891
17. Tan CM, Therien AG, Lu J, *et al.* Restoring methicillin-resistant *Staphylococcus aureus* susceptibility to  $\beta$ -lactam antibiotics. *Sci Transl Med.* 2012;4(126) doi:10.1126/scitranslmed.3003592
